1 **SEASONAL CHANGES IN BIRD ASSEMBLAGES OF A FOREST-STEPPE ECOTONE IN NORTH PATAGONIA**

2

3 **Víctor R. Cueto<sup>1,2</sup> and Cristian A. Gorosito<sup>1</sup>**

4

5 <sup>1</sup>Centro de Investigación Esquel de Montaña y Estepa Patagónica (CIEMEP), CONICET – Universidad

6 Nacional de la Patagonia San Juan Bosco, Roca 780, U9200 Esquel, Chubut, Argentina.

7

8 <sup>2</sup>Corresponding author: [vcueto@conicet.gov.ar](mailto:vcueto@conicet.gov.ar)

9

10

11

12 Running head: SEASONALITY IN PATAGONIAN BIRD ASSEMBLAGES

13

14

15

16 **Abstract.** We evaluate seasonal variations at the community level, analyzing changes in species richness,  
17 species composition and total abundance, and at the species level, evaluating differences in breeding  
18 and molting seasonality among bird species in a forest-steppe ecotone of north Patagonia. The bird  
19 assemblage showed a low seasonal variation in richness and total abundance, but a great change in  
20 species composition between spring-summer and fall-winter. The change in species composition  
21 promoted few seasonal variations in richness and total abundance, because they were compensated by  
22 the presence of abundant species that visit the area in different seasons. At the species level, resident  
23 birds and short distance migrants tended to begin breeding earlier than long distance migrants, and  
24 birds began to molt body and flight feathers after breeding. Therefore, we found a low overlap of these  
25 two demanding activities. Our results highlight the importance of bird movements in response to  
26 seasonal variations in the availability of resources, which promote migration or local displacements of  
27 birds.

28

29 **Resumen. Cambios estacionales en los ensambles de aves en un ecotono bosque-estepa del norte de**  
30 **Patagonia**

31 Evaluamos las variaciones estacionales a nivel comunitario, analizando la riqueza de especies, la  
32 composición de especies y la abundancia total, y a nivel de las especies, evaluando las diferencias en la  
33 estacionalidad reproductiva y de muda entre las especies de aves en un ecotono bosque-estepa del  
34 norte de Patagonia. El ensamble de aves mostró pocas variaciones estacionales en la riqueza y  
35 abundancia total, pero un notable cambio en la composición de especies entre la primavera-verano y el  
36 otoño-invierno. El cambio en la composición de especies promovió pocas variaciones estacionales en la  
37 riqueza y la abundancia total, porque fueron compensadas por la abundancia de las especies que visitan  
38 el área en las diferentes estaciones. A nivel de las especies, las aves residentes y migrantes de corta  
39 distancia tendieron a comenzar la reproducción antes que las migrantes de larga distancia, y las aves

40 comenzaron la muda de plumas del cuerpo y del ala al finalizar la reproducción. Por lo cual encontramos  
41 una baja superposición de estas dos demandantes actividades. Nuestros resultados remarcan la  
42 importancia del movimiento de las aves en respuesta a las variaciones en la disponibilidad de recursos,  
43 que promueven la migración o el desplazamiento local de las aves.

44 **Keywords:** Argentina, breeding season, Migration, Molting season, Seasonality, Species richness, Species  
45 composition

46

47 **INTRODUCTION**

48 Seasonal changes in the richness and abundance of bird species assemblages are characteristics of  
49 temperate forests (Wiens 1989), in part because some species migrate to avoid harsh climate conditions  
50 and reduced food supply during winter months (Newton 2008). In temperate regions of South America  
51 several studies have been conducted on the seasonality of bird assemblages (e.g., Capurro & Bucher  
52 1986, Marone 1992, Rozzi et al. 1996, Cueto & Lopez de Casenave 2000, Becerra & Grigera 2005, Ippi et  
53 al. 2009, Kelt et al. 2012), showing different patterns of seasonal changes, independent of geographic  
54 location. In the Chaco Forest (Capurro & Bucher 1986), Monte Desert (Marone 1992), Chilean  
55 Mediterranean Scrublands (Kelt et al. 2012) and northern Patagonian Forest (Rozzi et al. 1996, Becerra &  
56 Grigera 2005), richness values were lower during autumn-winter than in spring-summer, because of the  
57 migration of several species. Conversely, in Chilean southernmost Patagonian forest (Ippi et al. 2009) and  
58 in the Argentinean Coastal Woodlands (Cueto & Lopez de Casenave 2000) there was little variation in  
59 richness, because bird assemblages were composed by few migrant species. Although bird migration in  
60 South America is not considered to be as common as it is in the North Hemisphere (Elphick 2007), those  
61 studies on avian seasonality have shown the importance of migratory species in the structure of avian  
62 assemblages across different South American ecosystems.

63 General aspects about the origin and biogeography of birds inhabiting Patagonian forests are well  
64 known (Vuilleumier 1985). Also, there was an increase in the number of studies on bird communities in  
65 different forest types (Rozzi et al. 1996, Becerra & Grigera 2005, Grigera & Pavic 2007, Lantschner et al.  
66 2008, Ippi et al. 2009). However, life history aspects of bird species have been less studied. For example,  
67 despite previous studies on patterns of feather molt in the tropics of South America (e.g., Marini &  
68 Durães 2001, Ryder & Wolfe 2009, Silveira & Marini 2012, Jahn et al. 2016), almost nothing is known  
69 about this aspect of bird species in the Patagonian forest. Here, we evaluate seasonal variations in  
70 richness, species composition and total abundance at community level, and differences in breeding and

71 molting seasonality among bird species at species level in a forest-steppe ecotone of North Patagonia.  
72 Considering the climate seasonality in Patagonia, with harsher weather conditions during fall-winter  
73 than spring-summer, we expect lower richness and total abundance and no breeding and molting  
74 activity during autumn and winter than in spring and summer seasons.

75

## 76 **METHODS**

77 **Study site** — We conducted our study at Cañadón Florido Ranch (42° 55' S, 71° 21' W), Chubut Province,  
78 Argentina. The vegetation of the area corresponds to the Valdivian Forest Province of the Andean  
79 Region (Morrone 2001). We studied bird assemblages in a forest dominated by *Maytenus boaria* trees,  
80 commonly called Maitenales (Dimitri 1972). This forest is common in valleys and slope of hills in the  
81 eastern portion of Patagonian forest in Chubut Province, and forms part of the ecotone between the  
82 forest and the steppe (Kitzberger 2012). The forest canopy is low, averaging a height of 5 m. The  
83 understory is mainly dominated by *Berberis microphylla* shrubs. The climate is characterized by cold and  
84 wet winters and mild but dry summers. Most precipitation falls as rain and snow during fall and winter  
85 (April - September). Annual mean precipitation in the region is 484 mm. Summer and winter mean  
86 temperatures are 17° and 2.5 °C, respectively.

87

88 **Bird survey** — We caught birds with mist nets within a 20-ha plot (Fig. 1) from October 2015 to March  
89 2017. Nets were 12 m long with a 38 mm mesh size and were opened for 4–5 h after sunrise. We set two  
90 groups of 10 nets within the plot. Each group was set in different forest patches, 200 m apart (Fig. 1).  
91 Nets within each group were set 50 to 70 m apart and opened at least once per month. The order of net  
92 group sampling was set randomly, with 10 or 15 days between sampling events, depending on weather  
93 conditions (i.e., avoiding rainy or windy days). Due to adverse weather conditions, we sampled birds only  
94 once during June 2016 and February 2017, and because of logistic problems, we did not sample birds

95 during April and July 2016. Our sampling effort consisted of 49 net-days and 2469 net-hours. In Table 1  
96 we indicate the number of sampling days and the net hours of sampling on each month.  
97 We banded all birds with aluminum leg bands and took five morphological measurements: body mass,  
98 wing length, tail length, tarsus length, and bill length (from the anterior end of the nostril to the bill tip).  
99 We used a digital scale ( $\pm 0.1$  g) to record body mass, a wing ruler ( $\pm 1$  mm) for wing and tail  
100 measurements, and a digital caliper ( $\pm 0.01$  mm) for tarsus and bill measurements. We scored body molt  
101 intensity on a 5-point scale, from none to heavy (none = no feathers molting; trace = few feathers  
102 molting; light = involving more than one feather tract; medium = half of body feathers molting; heavy =  
103 most/all body feathers molting; Ralph et al. 1993). We scored remige molt by noting which primary  
104 feather and secondary feather was molting on each wing (Ralph et al. 1993). When classifying flight  
105 feather molt, we excluded birds with adventitious molt, following Wolfe et al. (2010), who considered  
106 symmetrical molt of the first primary feather to indicate the start of a molt cycle. Thus, we classified  
107 birds as being in remige molt when they were molting at least one primary feather on each wing. We  
108 scored the level of brood patch development on a 5-point scale (0 = no patch; 1 = smooth; 2 =  
109 vascularized; 3 = wrinkled; 4 = molting; Ralph et al. 1993). We scored development of the cloacal  
110 protuberance on a 4-point scale (0 = none; 1 = small, 2 = medium; 3 = large; Ralph et al. 1993). We  
111 determined sex of each individual based on characteristics of the plumage (Canevari et al. 1992),  
112 morphological differences (e.g., Cueto et al. 2015, Pyle et al. 2015), or the presence of a brood patch for  
113 females and a cloacal protuberance for males of species with sexually monomorphic plumage.

114  
115 **Climate patterns** — To assess the potential effect of climate on bird assemblage seasonality, we  
116 analyzed monthly variations on temperature and precipitation at the nearest weather station to our  
117 study site. Data were available from the weather station “Río Percy” (42° 51’ S, 71° 25’ W, belonging to  
118 Hidroeléctrica Futaleufú), located at 9 km from Cañadón Florido Ranch. We considered only mean

119 temperature, because maximum mean temperature and minimum mean temperature were strongly  
120 correlated with this variable ( $r = 0.97$  and  $r = 0.96$ , respectively).

121  
122 **Data analysis** — Abundance of each species was estimated using capture rate as the number of captures  
123 per 100 net-hours (Karr 1981). Although mist net sampling could underrepresent species richness  
124 because of a lower probability to capture canopy (Mallory et al. 2004), we considered that our  
125 estimation of richness is unbiased. First, the canopy height of the woodlands in our study area is around  
126 5 m and our nets have a height of 3 m. Second, we have been working in the study area since November  
127 2013 (see Bravo et al. 2017), and every time we visited the area, we recorded all bird species observed  
128 or heard. With the exception of raptors (e.g., *Milvago chimango*, *Polyborus plancus*, *Bubo magellanicus*)  
129 and bird species common in open habitats (e.g., *Hymenops perspicillatus*, *Lessonia rufa*, *Muscisaxicola*  
130 *macloviana*), we captured all species that we had recorded in the forest of our study area. Third, the  
131 species lists we recorded are similar to others reported in studies of the eastern zone of north  
132 Patagonian forests (e.g., Ralph 1985, Grigera & Pavic 2007).

133 Assemblage structure was evaluated through seasonal changes in total abundance, species richness and  
134 species composition. Total abundance was the sum of all new individuals captured each month (i.e., we  
135 did not include recaptured individuals during each month, but were considered when recaptured  
136 between months). Richness was estimated as the number of species captured each month. Species  
137 composition variations among months was evaluated through Cluster Analysis (with the statistical  
138 program InfoStat 2009). Months were classified based on the abundance of the species, using the Bray-  
139 Curtis dissimilarity index, and the dendrogram was constructed with the UPGMA algorithm (Sneath &  
140 Sokal 1973). We used the Cophenetic Correlation Coefficient to measure the agreement between the  
141 dendrogram and the original dissimilarity matrix (Sneath & Sokal, 1973). To determine the level of  
142 dissimilarity defining groups in the dendrogram, we considered the criteria of mean dissimilarity among

143 all month pairs (i.e., the average of all values in the original dissimilarity matrix; e.g., Holmes, 1981). In  
144 our Cluster Analysis we obtain a high Cophenetic Correlation Coefficients ( $r = 0.79$ ) indicating that the  
145 dendrogram is an accurate representation of the structure of the original dissimilarity matrices.  
146 Seasonality in richness and total abundance were evaluated through correlation analysis with monthly  
147 variations in temperature and precipitation, using Pearson Correlation tests.  
148 Actively breeding birds were identified by presence of a smooth or vascularized brood patch in females  
149 or a small, medium or large cloacal protuberance in males. At the assemblage level, we estimated the  
150 average percentage of females and males of all species actively breeding in each month, and the average  
151 percentage of individuals of all species molting body and wing feathers in each month. We estimated the  
152 average abundance of females and males of each species actively breeding in each month, and the  
153 average abundance of individuals of each species molting body and wing feathers in each month.

154

## 155 **RESULTS**

156 We captured 25 species and a total of 969 individuals were banded (Table 1). Little seasonal variation  
157 was evident in richness and total abundance, although climate showed a seasonal pattern, with lower  
158 temperatures during fall and winter and higher precipitations in winter (Fig. 2). Richness was higher in  
159 spring (October, November and December), but during other seasons show few changes (Fig. 2b). Total  
160 abundance did not show seasonality (Fig. 2c), the lowest value was recorded in September, and during  
161 January and February of the summer 2017 there was an abrupt increase, with more than twice the  
162 abundance recorded during the same months of the summer 2016 (Fig. 2c). Richness was not correlated  
163 with monthly variations in temperature and precipitation ( $r = 0.21$ ,  $P = 0.43$ ,  $n = 16$  and  $r = -0.29$ ,  $P = 0.27$ ,  
164  $n = 16$ , respectively). Total abundance also was not correlated with temperature and precipitation  
165 variations ( $r = 0.40$ ,  $P = 0.13$ ,  $n = 16$  and  $r = 0.01$ ,  $P = 0.97$ ,  $n = 16$ , respectively). In contrast, species  
166 composition shows seasonality. Mean dissimilarity among months based on species abundance



167 distinguished three groups in the dendrogram (Fig. 3). One group was constituted by spring-summer  
168 months, the second group by winter months, and a third group formed by March and September, i.e.,  
169 transitional months from summer to autumn (March) and from winter to spring (September). Spring-  
170 summer group was mainly composed by *Elaenia albiceps*, *Phytotoma rara*, *Diuca diuca*, *Asthenes*  
171 *pyrrholeuca* and *Troglodytes aedon*, and winter group by *Zonotrichia capensis*, *Colorhamphus*  
172 *parvirostris* and *Sephanoides sephaniodes* (Table 1). The transitional group was mainly characterized for  
173 the abundance of *Turdus falcklandii* (Table 1).

174 More than 35 % of all captured individuals were *Elaenia albiceps* (Table 1). This species began to be  
175 captured during the last days of October, with captures through March (Table 1). During the second  
176 summer we had a high capture rate of *Elaenia albiceps* (January and February 2017, Table 1). The second  
177 most abundant species was *Zonotrichia capensis* with more than 15% of all captured individuals (Table  
178 1). We captured two subspecies: *Zonotrichia capensis choraules* and *Zonotrichia capensis australis*. The  
179 former was present all year-round, although more abundant during fall (mainly in May, Table 1), while  
180 the latter was abundant during fall and winter months (Table 1). The other two more abundant species  
181 were *Turdus falcklandii* and *Phrygilus patagonicus* (Table 1), and both were present all year-round. In  
182 summary, these four species represent more than 70% of the annual average total abundance in the  
183 bird assemblage.

184 There were another five species present only during spring-summer and three during fall-winter. Spring-  
185 summer visitors were *Phytotoma rara*, *Diuca diuca*, *Asthenes pyrrholeuca*, *Troglodytes aedon* and  
186 *Phrygilus gayi*, and fall-winter visitors were *Colorhamphus parvirostris*, *Sephanoides sephaniodes* and  
187 *Mimus patagonicus* (Table 1). The rest of the species were present all year-round or had no clear  
188 seasonal pattern. For example, *Spinus barbatus* was very abundant only during spring, and was scarce in  
189 summer and fall and absent during winter (Table 1).

190 The breeding season lasted from September to March (Table 2). Males were the first individuals  
191 captured in breeding condition. The extreme case was a *Turdus falckandii* male captured in September  
192 (Table 2). Males of the rest of the species in breeding condition began to be captured in October (Table  
193 2), with the exception of *Elaenia albiceps*, *Diuca diuca* and *Troglodytes aedon* males, whose first  
194 captures began in November (Table 2). Females in breeding condition were captured beginning in  
195 November, but *Elaenia albiceps* and *Diuca diuca* females in breeding condition were first captured in  
196 December and January, respectively (Table 2).

197 Even though almost all species began molting body and wing feathers during summer months (mainly in  
198 February and March, Table 3), we recorded *Zenaida auriculata* and *Xolmis pyrope* molting feathers in  
199 November and December, respectively (Table 3). Two migrant species, *Troglodytes aedon* and *Diuca*  
200 *diuca* molted body and wing feathers (Table 3), but we did not capture any *Elaenia albiceps* molting.  
201 There was little overlap between breeding and molting events (Fig. 4). The percentage of breeding  
202 females was higher in December and January, while there was a similar percentage of breeding males  
203 from October to February (Fig. 4). In contrast, the highest percentage of individuals molting body and  
204 wing feathers was in March (Fig. 4).

205

## 206 **DISCUSSION**

207 The bird assemblage at Cañadón Florido did not show a seasonal pattern in richness and total  
208 abundance, contrary to our expectation given the strong climatic seasonality in this temperate zone of  
209 South America. Our results contrast with seasonal patterns of community parameters in temperate  
210 forests of Patagonia at the same latitude of our study site (i.e., lower richness and bird abundance  
211 during autumn-winter than in spring-summer, Rozzi et al. 1996), but are similar to that reported for the  
212 most southern forest of South America (Ippi et al. 2009). These contrasting results could be related to  
213 differences in location, forest composition, climatic conditions and bird assemblage composition. For

214 example, in the southern forests of Chile one third of the bird assemblage was composed by migratory  
215 species (Ippi et al. 2009), but about a half of the species in forests further north in Chile were found to  
216 be migrants (Jaksic & Feinsinger 1991). In our study site, a forest-steppe ecotone of North Patagonia, 42  
217 % of the species are migrants, but there are seven species that visit the zone during spring-summer and  
218 four that are present in fall-winter. This seasonal turnover of species that visit Cañadón Florido results in  
219 low seasonal variation of richness and total abundance. Also, the species turnover of bird assemblage in  
220 Cañadón Florido could be the reason of the lack of association among precipitation and temperature  
221 with bird richness and total abundance.

222 Visitors during fall-winter could be a result of the displacement of several species from mountain forests  
223 or from the steppe. For example, Rozzi et al. (1996) suggested that *Sephanoides sephaniodes* moves to  
224 lowland forest in winter, and in our study area we captured *Mimus patagonicus*, which is common in the  
225 steppe (Llanos et al. 2017). Moreover, the presence of *Colorhamphus parvirostris* during fall-winter  
226 could be related to movements from highland forest, similar to the displacement patterns of  
227 *Sephanoides sephaniodes*. *Colorhamphus parvirostris* is a partial migrant that has a year-round presence  
228 in the northern portion of its breeding distribution (Chesser & Marin 1994). Another partial migrant that  
229 visits our study site during fall-winter is *Zonotrichia capensis australis*. A similar pattern was recorded by  
230 Keve & Kovács (1971) for this subspecies in localities near El Bolsón and Bariloche (Argentina).  
231 *Zonotrichia capensis australis* breeds mainly in southern Argentina and Chile (King 1974, Piloni 2002,  
232 Ortiz & Capllonch 2011), and moves to northern latitudes in winter (Ortiz & Capllonch 2011, Sagario et  
233 al. 2014). During May we had a high capture rate of this subspecies, but during the following fall and  
234 winter months its capture rate was low. Thus, these birds could be on passage migration to lower  
235 latitudes in May. During spring and summer, we captured very few individuals of this subspecies in  
236 breeding condition, so at least a small population of this subspecies potentially breeds at our study site.  
237 During spring there is strong change in species composition due to the departure of winter visitors and

238 then arrival of long- and short-distance migrants, as *Elaenia albiceps* (a long-distance migrant, Bravo et  
239 al. 2017), *Phytotoma rutila*, *Diuca diuca*, *Asthenes pyrrholeuca* and *Troglodytes aedon* (short-distance  
240 migrants).

241 Total bird abundance did not show strong seasonal changes because it was compensated by spring-  
242 summer and fall-winter visitors. During spring and summer, *Elaenia albiceps* was the most abundant  
243 species in the Maitenal forest at Cañadón Florido ranch. This species arrived during the last weeks of  
244 October and the last individuals were captured in late March. Its high abundance during those months is  
245 also common in the eastern and western forests of Patagonia (e.g., Ralph 1985, Grigera et al. 1994, Rozzi  
246 et al. 1996, Jiménez 2000, Ippi et al. 2009). During fall and winter two subspecies of *Zonotrichia capensis*  
247 were the most abundant, and their high capture rates compensated the reduction in abundance due to  
248 departure of spring-summer visitors. *Zonotrichia capensis choraules* was resident all year-round, but its  
249 high capture rate was between March and August, and during the same months the partial migrant  
250 *Zonotrichia capensis australis* was also very abundant. *Zonotrichia capensis choraules* is resident in other  
251 localities of northern Patagonia (Keve & Kovács 1971), and both subspecies form flocks of hundreds of  
252 individuals during fall-winter in northern Patagonia (Keve & Kovács 1971) and in the region of the Monte  
253 desert (Sagarío et al. 2014, Zarco & Cueto 2017). During the second summer of our study (mainly  
254 January and February 2017), total abundance increased notably. This increase was due to a high capture  
255 rate of *Elaenia albiceps* and *Turdus falklandii* during that summer. Fruit abundance of *Berberis*  
256 *microphylla* and *Maytenus boaria* was higher in the summer 2017 than 2016 (Gorosito C.A. & Cueto V.R.,  
257 unpublished data). As these two species consume large quantities of fruit from those plant species  
258 (Amico & Aisen 2005), the high abundance of fruits could be the reason for their high capture rate  
259 during the summer 2017. Abundance of *Molothrus bonariensis* was low at Cañadón Florido ranch. This  
260 species is a generalist brood parasite that exerts significant impacts on the breeding success of its hosts  
261 (Reboreda et al. 2003). We recorded only five nests parasitized by *Molothrus bonariensis*, out of the 145

262 nests we found of 12 species (Gorosito C.A., unpublished data). Notably, all parasitized nests were of  
263 *Diuca diuca*. Therefore, at our study site, the effect of brood parasitism on breeding success of birds  
264 could be lower than that reported for northern localities (Reboreda et al. 2003).

265 Resident birds and short distance migrants tend to begin breeding earlier than long distance migrants  
266 (Murphy 1989). In Cañadón Florido we found the same pattern, since *Turdus falcklandii* males were in  
267 breeding condition as early as September, and males of the other resident and several short distance  
268 migrant species were in breeding condition in October. In contrast, captures of males in breeding  
269 condition of the long distance migrant *Elaenia albiceps* began in November. Females showed the same  
270 pattern than males, but differed over time. Females of resident and almost all short distance migrant  
271 species were in breeding condition in November, but captures of *Elaenia albiceps* females in breeding  
272 condition began in December. Similar differences in the beginning of reproduction between resident and  
273 long-distance migrants were found in species breeding in Monte desert (Mezquida 2002).

274 At Cañadón Florido, birds began to molt body and flight feathers in the last months of summer, with the  
275 exception of *Elaenia albiceps*, which did not molt. This long-distance migrant appears to molt in its  
276 wintering areas (Pyle et al. 2015). For example, birds molting the outer primaries were captured in  
277 Chapada dos Guimarães, Mato Grosso, Brazil (Guaraldo, A.C., personal communication). Feather molt is  
278 an energetically expensive activity within a bird's annual cycle (Lindström et al. 1993, Murphy 1996).

279 Therefore, it is more common that breeding and molting overlap in the tropics (Foster 1974, Johnson et  
280 al. 2012, de Araujo et al. 2017), whereas in temperate zones there is a low overlap between these two  
281 demanding activities (Jenni & Winkler 1994, Murphy 1996, Jahn et al. 2017). At our study site, we found  
282 this last pattern, as birds began to molt after breeding, and during a period of favorable climatic  
283 conditions. Hence, at the end of the summer, food availability was presumably sufficient for birds to pay  
284 the energetic cost of molting feathers.

285 In summary, the bird assemblage at Cañadón Florido showed lower seasonality in overall richness and  
286 total abundance, because of a turnover in the composition of species between spring-summer and fall-  
287 winter. These changes highlight the importance of bird movements in response to seasonal variation in  
288 resource availability that promote migration or local displacements of birds.

289

## 290 **ACKNOWLEDGMENTS**

291 We thank the Roberts family for allowing us to work at Cañadón Florido. For constructive reviews of the  
292 manuscript, we thank Alex Jahn and two anonymous referees. Research carried out at Cañadón Florido  
293 was founded by the National Geographic Society (USA) and the Bergstrom Award of the Association of  
294 Field Ornithologists (USA). Birds were captured with permission of Dirección de Fauna y Flora Silvestre,  
295 Provincia del Chubut (Argentina).

296

## 297 **REFERENCES**

298 Amico, GC & MA Aizen (2005) Seed dispersal by birds in a temperate forest of southern South America:  
299 who disperses to whom? *Ecología Austral* 15: 89–100.

300 Becerra, RM & D Grigera (2005) Dinámica estacional del ensamble de aves de un bosque norpatagónico  
301 de lenga (*Nothofagus pumilio*) y su relación con la disponibilidad de sustratos de alimentación. *Hornero*  
302 20: 131–139.

303 Bravo, SP, VR Cueto & CA Gorosito (2017) Migratory timing, rate, routes and wintering areas of White-  
304 crested Elaenia (*Elaenia albiceps chilensis*), a key seed disperser for Patagonian forest regeneration. *PLoS*  
305 *ONE* 12(2): e0170188.

306 Canevari, M, P Canevari, GR Carrizo, G Harris, J Rodríguez Mata & RJ Straneck (1991) *Nueva Guía de las*  
307 *Aves Argentinas*. Fundación Acindar, Buenos Aires, Argentina.

- 308 Capurro, H.A. & EH Bucher (1986) Variación estacional en la comunidad de aves del bosque chaqueño de  
309 Chamental. *Physis* 44: 1–6.
- 310 Chesser, RT & M Marín (1994) Seasonal distribution and natural history of the Patagonian Tyrant  
311 (*Colorhamphus parvirostris*). *Wilson Bulletin* 106: 649–667.
- 312 Cueto, VR, SP Bravo, N Trujillo-Arias & GS Cabanne (2015) Sex determination by morphometry of adult  
313 White-crested Elaenia (*Elaenia albiceps chilensis*). *Revista Brasileira de Ornitologia* 23: 18–24.
- 314 Cueto, VR & J Lopez de Casenave (2000) Seasonal changes in bird assemblages of coastal woodlands in  
315 east-central Argentina. *Studies on Neotropical Fauna and Environment* 35: 173–177.
- 316 Dimitri, M.J. (1972) *La región de los bosques Andino-Patagónicos. Sinopsis general*. Colección Científica  
317 del INTA, Buenos Aires, Argentina
- 318 de Araujo, HFP, AH Vieira-Filho, MR de V Barbosa, JAF Diniz-Filho & JMC da Silva JMC (2017) Passerine  
319 phenology in the largest tropical dry forest of South America: effects of climate and resource availability.  
320 *Emu* 117: 78–91.
- 321 Elphick, J (2007) *The atlas of bird migration: tracing the great journeys of the world's birds*. Natural  
322 History Museum, London, UK.
- 323 Foster, MS (1974) A model to explain molt-breeding overlap and clutch size in some tropical birds.  
324 *Evolution* 28: 182–190.
- 325 Grigera, D & C Pavic (2007) Ensamblajes de aves en un sitio quemado y en un sitio no alterado en un área  
326 forestal del noroeste de la Patagonia argentina. *Hornero* 22: 29–37.
- 327 Grigera, D, CA Ubeda & S Cali (1994) Caracterización ecológica del ensamble de tetrápodos del Parque y  
328 Reserva Nacional Nahuel Huapi, Argentina. *Revista Chilena de Historia Natural* 67: 273–298.
- 329 Holmes, RT (1981) Theoretical aspects of habitat use by birds. Pp 33–37 in Capen, DE (ed). *The use of*  
330 *multivariate statistics in studies of wildlife habitat*. USDA Forest Service general technical report RM-87,  
331 Vermont, USA.

- 332 INFOSTAT (2009) *InfoStat versión 2009*. Universidad Nacional de Córdoba, Córdoba, Argentina.
- 333 Ippi, S, CB Anderson, R Rozzi & CS Elphick (2009) Annual variation of abundance and composition in  
334 forest bird assemblages on Navarino Island, Cape Horn Biosphere Reserve, Chile. *Ornitología Neotropical*  
335 20: 231–245.
- 336 Jaksic, F M & P Feinsinger (1991) Bird assemblages in temperate forests of North and South America: a  
337 comparison of diversity, dynamics, guild structure, and resource use. *Revista Chilena de Historia Natural*  
338 64: 491–510.
- 339 Jahn, AE, V Bejarano, M Benavides Guzmán, LM Brown, IC Carvalho Provinciano, J Cereghetti, VR Cueto, JI  
340 Giraldo, V Gomez, MS Husak, H LePage, M MacPherson, MÂ Marini, MA Pizo, A Quickle, DV Roeder, JH  
341 Sarasola & DT Tuero (2017) Molt while breeding? Lessons from New World *Tyrannus* flycatchers. *Journal*  
342 *of Ornithology* 158: 1061–1072.
- 343 Jahn, AE, JI Giraldo, M MacPherson, DT Tuero, J Sarasola, J Cereghetti, DA Masson, MV Morales (2016)  
344 Demographic variation in timing and intensity of feather molt in migratory Fork-Tailed Flycatchers  
345 (*Tyrannus s. savana*). *Journal of Field Ornithology* 87: 143–154.
- 346 Jenni L & R Winkler (1994) *Moult and ageing in European passerines*. Academic Press, London, UK.
- 347 Jiménez, J E (2000) Effect of sample size, plot size, and counting time on estimates of avian diversity and  
348 abundance in a Chilean rainforest. *Journal of Field Ornithology* 71: 66–87.
- 349 Johnson, EI, PC Stouffer, RO Bierregaard (2012) The phenology of molting, breeding and their overlap in  
350 central Amazonian birds. *Journal of Avian Biology* 43: 141–154.
- 351 Karr, JA (1981) Surveying birds with mist nets. *Studies in Avian Biology* 6: 62–67.
- 352 Kelt, DA, A Engilis Jr, J Monárdez, R Walsh, PL Meserve & JR Gutiérrez (2012) Seasonal and multiannual  
353 patterns in avian assemblage structure and composition in northern Chilean thorn-scrub. *Condor* 114:  
354 30–43.



- 355 Keve, A & A Kovács (1971) Notas taxonómicas sobre el Chingolo (*Zonotrichia capensis*) del Sud-oeste  
356 Argentino. *Hornero* 11: 85–92.
- 357 King, JR (1974) Notes on geographical variation and the annual cycle in Patagonian populations of the  
358 Rufous-collared Sparrow *Zonotrichia capensis*. *Ibis* 116: 74–83.
- 359 Kitzberger, T (2012) Ecotones as complex arenas of disturbance, climate, and human impacts: the trans-  
360 Andean forest-steppe ecotone of northern Patagonia. Pp 59–88 in Myster, RW (ed). *Ecotones Between*  
361 *Forest and Grassland*. Springer, New York, USA.
- 362 Llanos, FA, M Failla, GJ García, PM Giovine, M Carbajal, PM González, D Paz Barreto, P. Quillfeldt & JF  
363 Masello (2011) Birds from the endangered Monte, the Steppes and Coastal biomes of the province of Río  
364 Negro, northern Patagonia, Argentina. *Check List* 7: 782–797.
- 365 Lantschner, MV, V Rusch & C Peyrou (2008) Bird assemblages in pine plantations replacing native  
366 ecosystems in NW Patagonia. *Biodiversity and Conservation* 17: 969–989.
- 367 Lindström, Å, GH Visser & S Daan (1993) The energetic cost of feather synthesis is proportional to basal  
368 metabolic rate. *Physiological Zoology* 66:490–510.
- 369 Mallory, EP, N Brokaw & SC Hess (2004) Coping with mist-net capture-rate bias: canopy height and  
370 several extrinsic factors. *Studies in Avian Biology* 29:151–160.
- 371 Marini, MÂ & Durães R (2001) Annual patterns of molt and reproductive activity of passerines in south-  
372 central Brazil. *Condor* 103: 767–775.
- 373 Marone, L (1992) Seasonal and year-to-year fluctuations of bird populations and guilds in the Monte  
374 Desert, Argentina. *Journal of Field Ornithology* 63: 294–308.
- 375 Mezquida, ET (2002) Nidificación de ocho especies de Tyrannidae en la Reserva de Ñacuñán, Mendoza,  
376 Argentina. *Hornero* 17: 31–40.
- 377 Morrone, JJ (2001) *Biogeografía de América Latina y el Caribe*. Manuales & Tesis de la Sociedad  
378 Entomológica Aragonesa, Zaragoza, Spain.

- 379 Murphy, ME (1996) Energetics and nutrition of molt. Pp 158–198 in Carey, C (ed). *Avian energetics and*  
380 *nutritional ecology*. Chapman and Hall, New York, USA.
- 381 Murphy, MT (1989) Life history variability in North American breeding tyrant flycatchers: phylogeny, size,  
382 or ecology? *Oikos* 54: 3–14.
- 383 Newton, I (2008) *The migration ecology of birds*. Elsevier Press, London, UK.
- 384 Ortiz, D & P Capllonch (2011) La migración del Chingolo (*Zonotrichia capensis*) en Argentina. *Historia*  
385 *Natural* 1: 105–109.
- 386 Piloni, G (2002) Revisión sistemática de las subespecies de *Zonotrichia capensis* (P.L.M. Muller) (Aves:  
387 Emberizidae) y su distribución geográfica en la República Argentina. *Physis* 60: 1–23.
- 388 Pyle, P., A. Engilis Jr., and D.A. Kelt. 2015. *Manual for ageing and sexing landbirds of Bosque Fray Jorge*  
389 *National Park and North-central Chile, with notes on occurrence and breeding seasonality*. Special  
390 Publication of the Occasional Papers of the Museum of Natural Science, Louisiana State University,  
391 Baton Rouge, USA.
- 392 Ralph, CJ (1985) Habitat association patterns of forest and steppe birds of northern Patagonia,  
393 Argentina. *Condor* 87:471–483.
- 394 Ralph, CJ, GR Guepel, P Pyle, TE Martin & DF DeSante (1993) *Handbook of field methods for monitoring*  
395 *landbirds*. US Forest Service general technical report PSW-GTR-144, Albany, USA.
- 396 Reboveda, JC, ME Mermoz, V Massoni, AA Astié, FL Rabuffetti (2003) Impacto del parasitismo de cría del  
397 Tordo Renegrado (*Molothrus bonariensis*) sobre el éxito reproductivo de sus hospedadores. *Hornero* 18:  
398 77–88.
- 399 Rozzi, R, JJ Armesto, A Correa, JC Torres-Mura & M Sallaberry (1996). Avifauna de bosques primarios  
400 templados en islas deshabitadas del archipiélago de Chiloé, Chile. *Revista Chilena de Historia Natural* 69:  
401 125–139.

- 402 Ryder, TB & JD Wolfe (2009) The current state of knowledge on molt and plumage sequences in selected  
403 neotropical bird Families: a review. *Ornitología Neotropical* 20: 1–18.
- 404 Sagario, MC, VR Cueto & J Lopez de Casenave (2014) Movement patterns of three species of sparrows in  
405 the central Monte desert: differences between and within species. *Emu* 114: 268–276.
- 406 Silveira, MB& Marini MÂ (2012) Timing, duration, and intensity of molt in birds of a Neotropical savanna  
407 in Brazil. *Condor* 114: 435–448.
- 408 Sneath, PHA & RR Sokal (1973). *Numerical taxonomy. The principle and practice of numerical*  
409 *classification*. WH Freeman & Co, San Francisco, USA.
- 410 Vuilleumier, F (1985) Forest Birds of Patagonia: Ecological Geography, Speciation, Endemism, and Faunal  
411 History. *Ornithological Monographs* 36: 255–304.
- 412 Wiens, JA (1989) *The ecology of bird communities*. Cambridge University Press, Cambridge, UK.
- 413 Wolfe, JD, TB Ryder & P Pyle (2010) Using molt cycles to categorize the age of tropical birds: an  
414 integrative new system. *Journal of Field Ornithology* 81: 186–194.
- 415 Zarco, A & VR Cueto (2017) Winter flock structure in the central Monte desert, Argentina. *Ardea* 105:  
416 89–97.
- 417



419 Table 1. Monthly abundance (individuals captured per 100 net hours) for each bird species captured during the 2015-2017 period in a forest-  
 420 steppe ecotone at Cañadón Florido Ranch, Chubut Province, Argentina. For 'Resident status', 'Spr-Sum' indicates species that visit Cañadón  
 421 Florido in spring-summer and Fall-Win during fall-winter months. Species are listed in order of their percent contribution to average total  
 422 abundance during the study period. The symbol "—" denotes zero individuals captured. \* percentage corresponds to both subspecies of  
 423 *Zonotrichia capensis* in each month. † Introduced species from North America.  
 424

| Species                               | Resident status | Abundance (%) | 2015 |      |      | 2016 |      |      |      |     |     |      | 2017 |      |      |      |       |      |
|---------------------------------------|-----------------|---------------|------|------|------|------|------|------|------|-----|-----|------|------|------|------|------|-------|------|
|                                       |                 |               | Oct  | Nov  | Dec  | Jan  | Feb  | Mar  | May  | Jun | Ago | Sep  | Oct  | Nov  | Dec  | Jan  | Feb   | Mar  |
| <i>Elaenia albiceps</i>               | Spr-Sum         | 36.7          | —    | 11.9 | 20.1 | 36.2 | 51.7 | 6.5  | —    | —   | —   | —    | 1.3  | 9.1  | 37.9 | 83.1 | 107.0 | 8.8  |
| <i>Zonotrichia capensis choraules</i> | Resident        | 15.8*         | 1.8  | 0.2  | 1.4  | 1.0  | 4.5  | 14.2 | 24.0 | 1.8 | 3.3 | —    | 2.2  | 2.0  | 1.5  | —    | 9.3   | 3.1  |
| <i>Zonotrichia capensis australis</i> | Fall-Win        | —             | —    | 0.3  | —    | —    | 7.8  | 48.0 | 9.1  | 8.9 | 0.7 | 1.3  | —    | 0.5  | —    | —    | —     | 12.5 |
| <i>Turdus falckandii</i>              | Resident        | 13.8          | 6.7  | 3.7  | 6.4  | 2.9  | 3.9  | 15.1 | 3.0  | 1.8 | 1.5 | 21.1 | 2.5  | 2.7  | 11.7 | 32.9 | 14.0  | 30.3 |
| <i>Phrygilus patagonicus</i>          | Resident        | 6.3           | 4.7  | 1.7  | 2.0  | —    | —    | —    | 12.0 | 9.1 | 6.5 | 0.8  | 9.5  | 1.4  | 1.9  | 6.7  | 4.7   | —    |
| <i>Spinus barbatus</i>                | Resident        | 4.7           | 5.8  | 5.0  | 2.3  | 0.7  | —    | 1.9  | 1.0  | —   | —   | —    | 8.7  | 13.9 | 5.2  | —    | —     | 1.4  |
| <i>Anairetes parulus</i>              | Resident        | 3.5           | 1.4  | 1.2  | 2.9  | 0.5  | 1.0  | 3.3  | 2.0  | 5.5 | 4.7 | —    | 0.8  | 1.3  | 2.3  | 4.1  | —     | 4.6  |
| <i>Phytotoma rara</i>                 | Spr-Sum         | 3.3           | 2.0  | —    | —    | 1.3  | 1.1  | 0.8  | —    | —   | —   | —    | 3.0  | 4.1  | 1.4  | 0.7  | 18.6  | —    |
| <i>Diuca diuca</i>                    | Spr-Sum         | 2.0           | 1.3  | 2.4  | 1.5  | 1.3  | 0.6  | 3.8  | —    | —   | 0.7 | —    | —    | 7.7  | 0.5  | —    | —     | —    |
| <i>Asthenes pyrrholeuca</i>           | Spr-Sum         | 2.0           | 3.0  | 0.9  | 1.1  | 1.9  | —    | —    | —    | —   | —   | —    | 1.7  | 5.0  | 6.2  | —    | —     | —    |
| <i>Troglodytes aedon</i>              | Spr-Sum         | 1.7           | —    | 1.9  | 1.8  | 4.6  | 0.6  | 1.0  | —    | —   | —   | —    | —    | 1.3  | 1.9  | 0.7  | —     | 3.1  |
| <i>Xolmis pyrope</i>                  | Resident        | 1.5           | —    | 0.6  | 1.3  | 2.7  | —    | —    | 2.0  | —   | 2.7 | 0.6  | 1.5  | 3.2  | —    | 0.7  | —     | —    |
| <i>Phrygilus gayi</i>                 | Spr-Sum         | 1.1           | 5.7  | 2.2  | 1.5  | 0.7  | —    | —    | —    | —   | —   | —    | —    | —    | 1.0  | —    | —     | —    |
| <i>Leptasthenura aegithaloides</i>    | Resident        | 1.1           | 0.7  | 0.5  | 0.2  | 1.4  | 1.1  | 0.8  | —    | 3.6 | 0.6 | —    | 0.7  | —    | 0.5  | 0.7  | —     | —    |
| <i>Colorhamphus parvirostris</i>      | Fall-Win        | 1.0           | —    | —    | —    | —    | —    | —    | 4.0  | 1.8 | 4.0 | 0.4  | —    | —    | —    | —    | —     | —    |
| <i>Callipepla californica</i> †       | Resident        | 1.0           | —    | —    | —    | —    | —    | 5.2  | —    | —   | —   | 0.8  | —    | 0.7  | —    | —    | —     | 2.9  |
| <i>Zenaida auriculata</i>             | Resident        | 0.8           | —    | 1.7  | 1.3  | 0.8  | 0.6  | —    | —    | —   | —   | —    | 0.8  | 1.4  | 1.8  | —    | —     | —    |
| <i>Colaptes pitius</i>                | Resident        | 0.8           | —    | 0.8  | 0.5  | —    | —    | 1.9  | 1.0  | 1.8 | 0.7 | —    | —    | 0.7  | 0.5  | —    | —     | —    |
| <i>Upucerthia saturatior</i>          | Resident        | 0.8           | 0.7  | 0.8  | 0.2  | —    | —    | —    | —    | —   | —   | 0.4  | —    | 0.7  | —    | —    | 4.7   | —    |
| <i>Curaeus curaeus</i>                | Resident        | 0.7           | —    | 0.4  | 0.8  | 0.5  | —    | —    | —    | —   | 1.5 | —    | —    | 0.7  | —    | 3.3  | —     | —    |
| <i>Sephanoides sephaniodes</i>        | Fall-Win        | 0.7           | —    | —    | —    | —    | —    | —    | 1.0  | 3.6 | 1.2 | 0.8  | —    | —    | —    | —    | —     | —    |
| <i>Mimus patagonicus</i>              | Fall-Win        | 0.5           | —    | —    | —    | —    | —    | —    | —    | 5.5 | —   | —    | —    | —    | —    | —    | —     | —    |
| <i>Aphastura spinicauda</i>           | Resident        | 0.3           | 0.7  | —    | —    | —    | 0.6  | —    | —    | —   | 1.2 | 0.4  | —    | —    | —    | —    | —     | —    |
| <i>Sturnella loyca</i>                | Resident        | 0.1           | —    | 1.2  | —    | —    | —    | —    | —    | —   | —   | —    | —    | —    | —    | —    | —     | —    |
| <i>Agriornis lividus</i>              | Resident        | 0.1           | —    | —    | —    | —    | —    | —    | 1.0  | —   | —   | —    | —    | —    | —    | —    | —     | —    |
| <i>Molothrus bonariensis</i>          | Spr-Sum         | 0.1           | —    | —    | 0.7  | —    | —    | —    | —    | —   | —   | —    | —    | —    | 0.5  | —    | —     | —    |
| Number of sampling days               |                 |               | 3    | 7    | 6    | 4    | 3    | 3    | 2    | 1   | 3   | 4    | 3    | 2    | 3    | 2    | 1     | 2    |
| Net hours of sampling                 |                 |               | 160  | 346  | 315  | 149  | 125  | 107  | 100  | 55  | 143 | 278  | 240  | 110  | 180  | 85   | 23    | 51   |

425  
 426  
 427 Table 2. Average monthly abundance (individuals captured per 100 net-hours) of females and males in  
 428 breeding condition across bird species in a forest-steppe ecotone at Cañadón Florido Ranch, Chubut  
 429 Province, Argentina. Species are listed following the order in Table 1. The symbol “—” denotes zero  
 430 individuals captured in breeding conditions.  
 431

| Species                               | Sex    | Sep | Oct | Nov | Dec | Jan  | Feb  | Mar |
|---------------------------------------|--------|-----|-----|-----|-----|------|------|-----|
| <i>Elaenia albiceps</i>               | Female | —   | —   | —   | 1.2 | 5.0  | 4.7  | 0.5 |
|                                       | Male   | —   | —   | 2.6 | 6.9 | 16.3 | 20.9 | —   |
| <i>Zonotrichia capensis choraules</i> | Female | —   | —   | —   | 0.4 | —    | —    | —   |
|                                       | Male   | —   | 1.5 | 0.6 | 0.4 | —    | —    | —   |
| <i>Zonotrichia capensis australis</i> | Female | —   | —   | —   | 0.4 | —    | —    | —   |
|                                       | Male   | —   | 0.8 | —   | 0.4 | —    | —    | —   |
| <i>Turdus falcklandii</i>             | Female | —   | —   | 0.1 | 1.9 | 1.8  | —    | 0.5 |
|                                       | Male   | 0.2 | 2.7 | 1.2 | 2.9 | 0.9  | —    | 1.4 |
| <i>Phrygilus patagonicus</i>          | Female | —   | —   | —   | 1.2 | 0.3  | —    | —   |
|                                       | Male   | —   | 3.3 | 1.3 | 0.8 | 0.3  | —    | —   |
| <i>Spinus barbatus</i>                | Female | —   | —   | 1.3 | 1.0 | 0.6  | —    | —   |
|                                       | Male   | —   | 3.6 | 5.1 | 1.4 | —    | —    | —   |
| <i>Anairetes parulus</i>              | Female | —   | 0.3 | —   | 0.3 | 0.3  | —    | —   |
|                                       | Male   | —   | 0.7 | 0.7 | 0.3 | —    | —    | —   |
| <i>Phytotoma rara</i>                 | Female | —   | —   | 0.5 | —   | —    | —    | —   |
|                                       | Male   | —   | 0.8 | 0.5 | 0.6 | 0.6  | 2.3  | —   |
| <i>Diuca diuca</i>                    | Female | —   | —   | —   | —   | 0.3  | —    | —   |
|                                       | Male   | —   | —   | 4.5 | 0.5 | —    | —    | —   |
| <i>Asthenes pyrrholeuca</i>           | Female | —   | —   | 0.1 | 1.8 | —    | —    | —   |
|                                       | Male   | —   | 0.9 | 1.3 | 0.9 | —    | —    | —   |
| <i>Troglodytes aedon</i>              | Female | —   | —   | 1.4 | 0.2 | —    | —    | —   |
|                                       | Male   | —   | —   | 0.9 | 0.9 | 0.6  | 2.3  | —   |
| <i>Xolmis pyrope</i>                  | Female | —   | —   | 0.7 | 0.2 | 1.3  | —    | —   |
|                                       | Male   | —   | 0.4 | 0.9 | 0.3 | —    | 2.3  | —   |
| <i>Phrygilus gayi</i>                 | Female | —   | —   | —   | 0.3 | 0.3  | —    | —   |
|                                       | Male   | —   | 0.6 | 0.9 | 0.9 | —    | —    | —   |
| <i>Leptasthenura aegithaloides</i>    | Female | —   | —   | 0.1 | 0.4 | 0.7  | —    | —   |
|                                       | Male   | —   | 0.3 | —   | —   | —    | —    | —   |
| <i>Upucerthia saturator</i>           | Female | —   | 0.3 | 0.7 | 0.2 | —    | —    | —   |
|                                       | Male   | —   | —   | —   | —   | —    | 2.3  | —   |
| <i>Curaeus curaeus</i>                | Female | —   | —   | 0.1 | 0.3 | 0.3  | —    | —   |
|                                       | Male   | —   | —   | 0.5 | 0.2 | 0.6  | —    | —   |
| <i>Aphrastura spinicauda</i>          | Female | —   | —   | —   | —   | —    | —    | —   |
|                                       | Male   | —   | 0.3 | —   | —   | —    | —    | —   |

432  
 433

434 Table 3. Average monthly abundance of molting individuals (individuals captured per 100 net-hours) of  
 435 each bird species in a forest-steppe ecotone at Cañadón Florido Ranch, Chubut Province, Argentina.  
 436 Species are listed following the order in Table 1. The symbol “–” denotes zero individuals captured in  
 437 molting conditions.  
 438

| Species                               | Molt            | Nov | Dec | Jan | Feb | Mar |
|---------------------------------------|-----------------|-----|-----|-----|-----|-----|
| <i>Zonotrichia capensis choraules</i> | Body            | —   | —   | —   | 1.2 | 0.9 |
|                                       | Flight feathers | —   | —   | —   | 0.8 | 0.5 |
| <i>Zonotrichia capensis australis</i> | Body            | —   | —   | —   | —   | 0.5 |
|                                       | Flight feathers | —   | —   | —   | —   | 0.9 |
| <i>Turdus falcklandii</i>             | Body            | —   | —   | —   | —   | 9.6 |
|                                       | Flight feathers | —   | —   | 2.7 | 1.6 | 5.7 |
| <i>Phrygilus patagonicus</i>          | Body            | —   | —   | —   | 2.3 | —   |
|                                       | Flight feathers | —   | —   | 0.6 | —   | —   |
| <i>Spinus barbatus</i>                | Body            | —   | —   | —   | —   | —   |
|                                       | Flight feathers | —   | —   | 0.6 | —   | —   |
| <i>Anairetes parulus</i>              | Body            | —   | —   | —   | 0.4 | 3.8 |
|                                       | Flight feathers | —   | —   | —   | 0.4 | 3.8 |
| <i>Phytotoma rara</i>                 | Body            | —   | —   | 0.6 | 2.3 | 0.5 |
|                                       | Flight feathers | —   | —   | —   | 2.3 | —   |
| <i>Diuca diuca</i>                    | Body            | —   | —   | —   | 0.4 | 0.9 |
|                                       | Flight feathers | —   | —   | —   | 0.4 | 1.4 |
| <i>Troglodytes aedon</i>              | Body            | —   | —   | 0.7 | —   | 0.5 |
|                                       | Flight feathers | —   | —   | 0.7 | —   | 0.5 |
| <i>Xolmis pyrope</i>                  | Body            | —   | —   | —   | —   | —   |
|                                       | Flight feathers | —   | 0.2 | —   | —   | —   |
| <i>Leptasthenura aegithaloides</i>    | Body            | —   | —   | 0.3 | —   | 0.5 |
|                                       | Flight feathers | —   | —   | —   | —   | 0.5 |
| <i>Callipepla californica</i>         | Body            | —   | —   | —   | —   | 2.9 |
|                                       | Flight feathers | —   | —   | —   | —   | 2.4 |
| <i>Zenaida auriculata</i>             | Body            | —   | —   | —   | —   | —   |
|                                       | Flight feathers | 0.2 | —   | —   | —   | —   |
| <i>Upucerthia saturator</i>           | Body            | —   | —   | —   | 2.3 | —   |
|                                       | Flight feathers | —   | —   | —   | 2.3 | —   |
| <i>Curaeus curaeus</i>                | Body            | —   | —   | 0.6 | —   | —   |
|                                       | Flight feathers | —   | —   | 0.6 | —   | —   |

439

440

441 Figure 1. Study site map showing the forest areas (in grey) at Cañadón Florido Ranch, Chubut Province,  
442 Argentina. The two ellipses indicate the zone where mist nets were installed in the area.

443  
444 Figure 2. Monthly changes in mean temperature (solid line) and precipitation (dashed line) (a), richness  
445 (b) and total abundance (individuals captured per 100 net hours) (c) in a forest-steppe ecotone at  
446 Cañadón Florido Ranch, Chubut Province, Argentina.

447  
448 Figure 3. Cluster Analysis based on bird species abundance from a forest-steppe ecotone (Cañadón  
449 Florido Ranch, Chubut Province, Argentina), showing month groups. Dashed line indicates mean  
450 dissimilarity among all month pairs.

451  
452 Figure 4. Monthly changes in the percentage of individuals in breeding and molting condition in a forest-  
453 steppe ecotone at Cañadón Florido Ranch, Chubut Province, Argentina.

454



455 Figure 1.

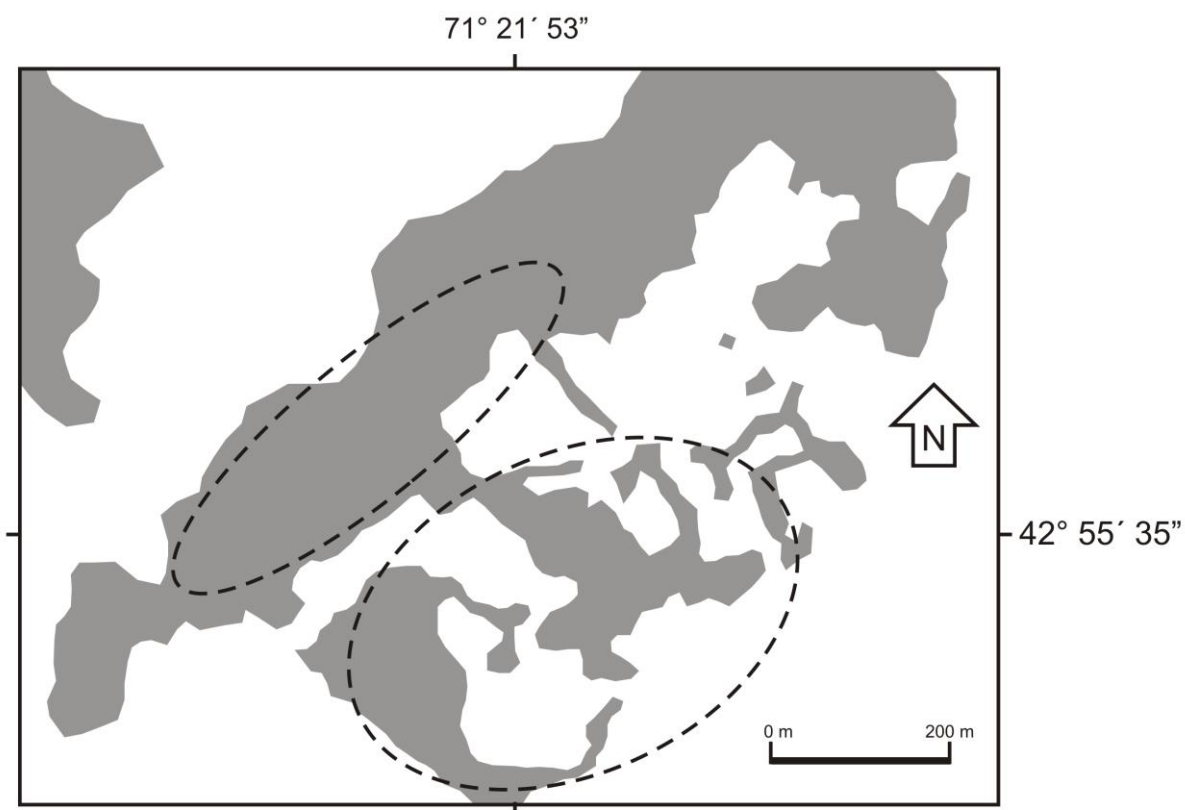

456

457

458 Figure 2.

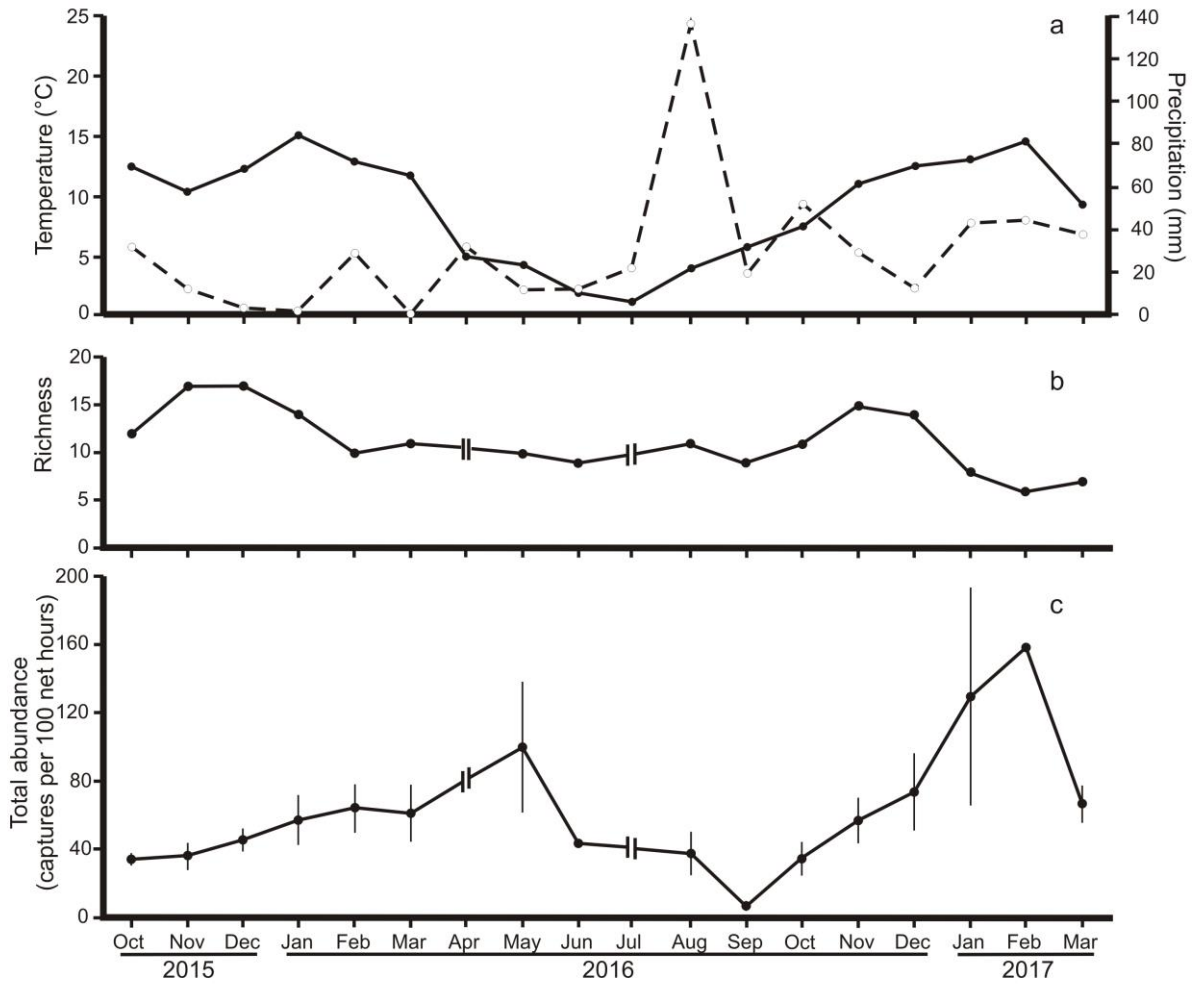

459

460

461 Figure 3.

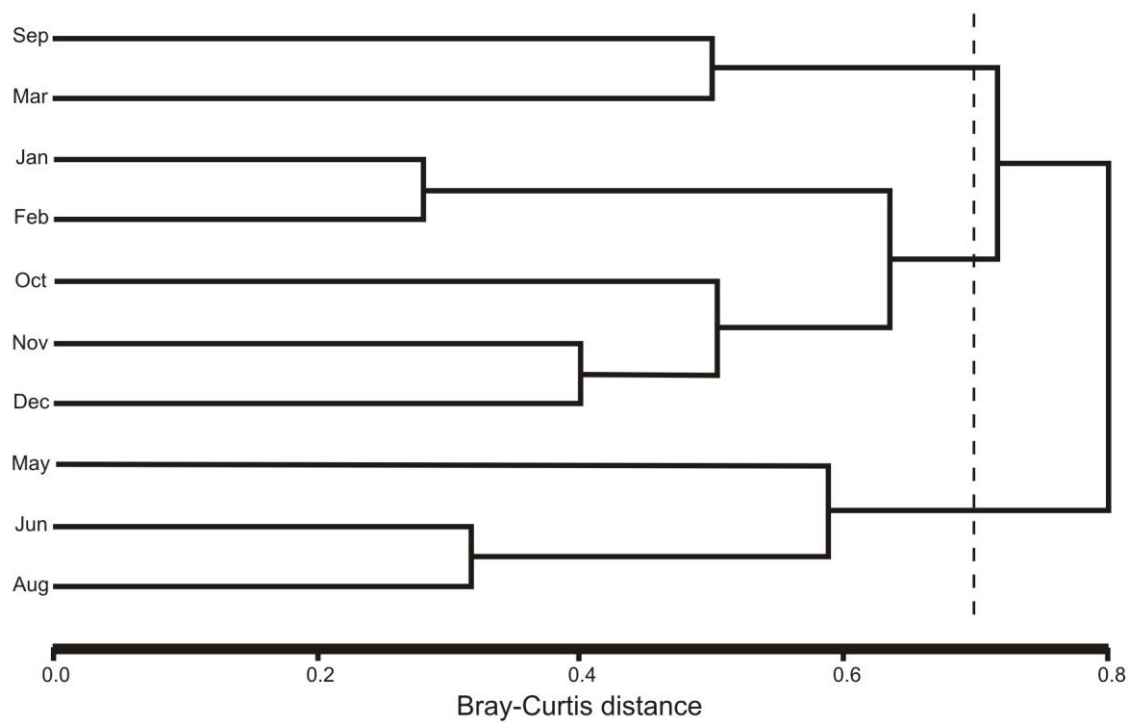

462

463

464

465 Figure 4.

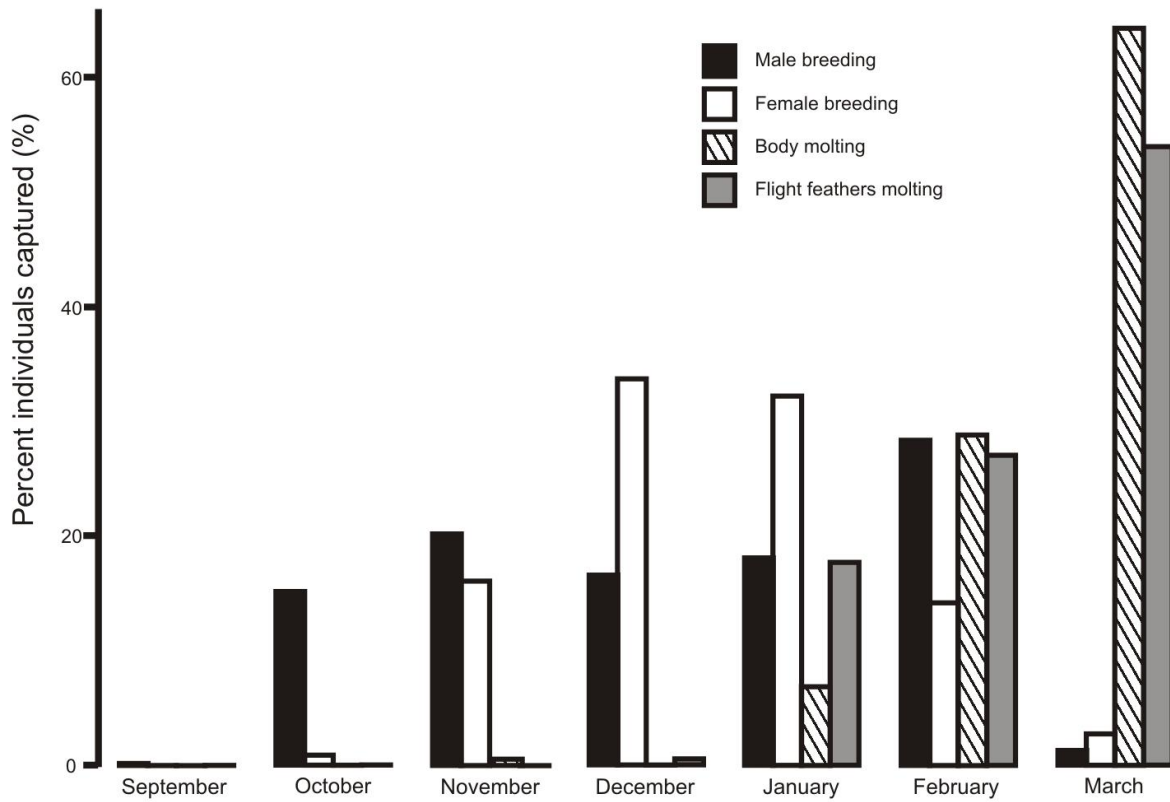

466
